# Supplementary material for: Combined Thermomechanical–Biological Treatment for Corn By-Product Valorization into Added-Value Food (Feed) Material
Source: MDPI journal article supplement (doi:10.3390/plants11223080), 2022-11-14
Supplement: s1 [file s1]

## SUPPLEMENTARY MATERIAL

**Table S1.** The fatty acids percentage profile of the corn by-products.

| Fatty acid | Corn by-product samples |                     |                    |                    |                     |                   |                      |                     |                     |                      |                   |                      |                     |                     |                      |                   |                      |                     |                     |                      |
|------------|-------------------------|---------------------|--------------------|--------------------|---------------------|-------------------|----------------------|---------------------|---------------------|----------------------|-------------------|----------------------|---------------------|---------------------|----------------------|-------------------|----------------------|---------------------|---------------------|----------------------|
|            | C <sub>con</sub>        | C <sub>conLpl</sub> | C <sub>conLu</sub> | C <sub>conLc</sub> | C <sub>conLpa</sub> | C <sub>ex14</sub> | C <sub>ex14Lpl</sub> | C <sub>ex14Lu</sub> | C <sub>ex14Lc</sub> | C <sub>ex14Lpa</sub> | C <sub>ex16</sub> | C <sub>ex16Lpl</sub> | C <sub>ex16Lu</sub> | C <sub>ex16Lc</sub> | C <sub>ex16Lpa</sub> | C <sub>ex18</sub> | C <sub>ex18Lpl</sub> | C <sub>ex18Lu</sub> | C <sub>ex18Lc</sub> | C <sub>ex18Lpa</sub> |
| C4:0       | <LOD                    | <LOD                | <LOD               | <LOD               | <LOD                | <LOD              | <LOD                 | <LOD                | 0.07 ±<br>0.007 b   | <LOD                 | <LOD              | 0.06 ±<br>0.008 b    | 0.08 ±<br>0.014 b   | <LOD                | 0.03 ±<br>0.005 a    | <LOD              | 0.17 ±<br>0.021 c    | <LOD                | <LOD                | <LOD                 |
| C6:0       | <LOD                    | <LOD                | <LOD               | <LOD               | <LOD                | 0.03 ±<br>0.005 a | <LOD                 | <LOD                | 0.07 ±<br>0.012 b   | <LOD                 | <LOD              | 0.05 ±<br>0.004 b    | 0.07 ±<br>0.016 b   | <LOD                | <LOD                 | <LOD              | 0.18 ±<br>0.029 c    | <LOD                | <LOD                | <LOD                 |
| C8:0       | <LOD                    | <LOD                | 0.01 ±<br>0.002 a  | 0.01 ±<br>0.001 a  | <LOD                | 0.03 ±<br>0.004 b | <LOD                 | <LOD                | 0.09 ±<br>0.011 d   | <LOD                 | <LOD              | 0.11 ±<br>0.018 d    | 0.06 ±<br>0.006 c   | <LOD                | 0.03 ±<br>0.004 b    | 0.05 ±<br>0.011 c | 0.15 ±<br>0.021 e    | <LOD                | 0.11 ±<br>0.022 d   | <LOD                 |
| C10:0      | <LOD                    | <LOD                | 0.01 ±<br>0.001 a  | 0.01 ±<br>0.002 a  | 0.01 ±<br>0.002 a   | <LOD              | <LOD                 | <LOD                | 0.15 ±<br>0.017 d   | 0.08 ±<br>0.016 c    | <LOD              | 0.09 ±<br>0.009 c    | 0.16 ±<br>0.026 d   | <LOD                | <LOD                 | 0.05 ±<br>0.006 b | 0.29 ±<br>0.03 e     | <LOD                | 0.14 ±<br>0.032 d   | <LOD                 |
| C10:1      | <LOD                    | <LOD                | <LOD               | <LOD               | <LOD                | <LOD              | <LOD                 | <LOD                | <LOD                | <LOD                 | <LOD              | <LOD                 | <LOD                | <LOD                | <LOD                 | <LOD              | <LOD                 | <LOD                | <LOD                | <LOD                 |
| C10:2      | <LOD                    | <LOD                | <LOD               | <LOD               | <LOD                | <LOD              | <LOD                 | <LOD                | <LOD                | <LOD                 | <LOD              | <LOD                 | <LOD                | <LOD                | <LOD                 | <LOD              | <LOD                 | <LOD                | <LOD                | <LOD                 |
| C11:0      | <LOD                    | <LOD                | <LOD               | <LOD               | <LOD                | <LOD              | <LOD                 | <LOD                | <LOD                | <LOD                 | <LOD              | <LOD                 | <LOD                | <LOD                | <LOD                 | <LOD              | <LOD                 | <LOD                | <LOD                | <LOD                 |
| C11:1      | <LOD                    | <LOD                | <LOD               | <LOD               | <LOD                | <LOD              | <LOD                 | <LOD                | <LOD                | <LOD                 | <LOD              | <LOD                 | <LOD                | <LOD                | <LOD                 | <LOD              | <LOD                 | <LOD                | <LOD                | <LOD                 |
| C11:2      | <LOD                    | <LOD                | <LOD               | <LOD               | <LOD                | <LOD              | <LOD                 | <LOD                | <LOD                | <LOD                 | <LOD              | <LOD                 | <LOD                | <LOD                | <LOD                 | <LOD              | <LOD                 | <LOD                | <LOD                | <LOD                 |
| C12:0      | 0.03 ±<br>0.004 c       | 0.02 ±<br>0.003 b   | 0.03 ±<br>0.006 c  | 0.03 ±<br>0.006 c  | 0.01 ±<br>0.001 a   | 0.17 ±<br>0.025 f | 0.04 ±<br>0.008 c    | <LOD                | 0.44 ±<br>0.054 h   | 0.26 ±<br>0.046 g    | 0.2 ±<br>0.017 f  | 0.34 ±<br>0.064 g    | 0.2 ±<br>0.033 f    | 0.12 ±<br>0.014 e   | 0.07 ±<br>0.015 d    | 0.11 ±<br>0.019 e | 0.59 ±<br>0.124 i    | 0.36 ±<br>0.037 h   | 0.37 ±<br>0.058 h   | 0.15 ±<br>0.023 e    |
| C12:1      | <LOD                    | <LOD                | <LOD               | <LOD               | <LOD                | <LOD              | <LOD                 | <LOD                | <LOD                | <LOD                 | <LOD              | <LOD                 | <LOD                | <LOD                | <LOD                 | <LOD              | <LOD                 | <LOD                | <LOD                | <LOD                 |
| C12:2      | <LOD                    | <LOD                | <LOD               | <LOD               | <LOD                | <LOD              | <LOD                 | <LOD                | <LOD                | <LOD                 | <LOD              | <LOD                 | <LOD                | <LOD                | <LOD                 | <LOD              | <LOD                 | <LOD                | <LOD                | <LOD                 |
| C13:0      | <LOD                    | <LOD                | <LOD               | <LOD               | <LOD                | <LOD              | <LOD                 | <LOD                | <LOD                | <LOD                 | <LOD              | <LOD                 | <LOD                | <LOD                | <LOD                 | <LOD              | <LOD                 | <LOD                | <LOD                | <LOD                 |
| C13:1      | <LOD                    | <LOD                | <LOD               | <LOD               | <LOD                | <LOD              | <LOD                 | <LOD                | <LOD                | <LOD                 | <LOD              | <LOD                 | <LOD                | <LOD                | <LOD                 | <LOD              | <LOD                 | <LOD                | <LOD                | <LOD                 |
| C13:2      | <LOD                    | <LOD                | <LOD               | <LOD               | <LOD                | <LOD              | <LOD                 | <LOD                | <LOD                | <LOD                 | <LOD              | <LOD                 | <LOD                | <LOD                | <LOD                 | <LOD              | <LOD                 | <LOD                | <LOD                | <LOD                 |
| C14:0      | 0.09 ±<br>0.014 b       | 0.05 ±<br>0.007 a   | 0.08 ±<br>0.014 b  | 0.08 ±<br>0.018 b  | 0.05 ±<br>0.007 a   | 0.22 ±<br>0.019 c | 0.07 ±<br>0.012 a    | 0.09 ±<br>0.018 b   | 0.67 ±<br>0.054 g   | 0.32 ±<br>0.067 d    | 0.19 ±<br>0.02 c  | 0.51 ±<br>0.103 f    | 0.63 ±<br>0.067 f   | 0.26 ±<br>0.026 d   | 0.19 ±<br>0.03 c     | 0.24 ±<br>0.049 c | 1.4 ±<br>0.284 i     | 0.43 ±<br>0.084 e   | 0.83 ±<br>0.077 h   | 0.33 ±<br>0.058 d    |
| C14:1      | <LOD                    | <LOD                | <LOD               | <LOD               | <LOD                | <LOD              | <LOD                 | <LOD                | <LOD                | <LOD                 | <LOD              | <LOD                 | <LOD                | <LOD                | <LOD                 | <LOD              | 0.1 ±<br>0.012       | <LOD                | <LOD                | <LOD                 |

|           |                     |                    |                     |                    |                    |                    |                    |                    |                     |                    |                    |                    |                    |                    |                    |                    |                    |                    |                    |                    |
|-----------|---------------------|--------------------|---------------------|--------------------|--------------------|--------------------|--------------------|--------------------|---------------------|--------------------|--------------------|--------------------|--------------------|--------------------|--------------------|--------------------|--------------------|--------------------|--------------------|--------------------|
| C14:2     | <LOD                | <LOD               | <LOD                | <LOD               | <LOD               | <LOD               | <LOD               | <LOD               | <LOD                | <LOD               | <LOD               | <LOD               | <LOD               | <LOD               | <LOD               | <LOD               | <LOD               | <LOD               | <LOD               | <LOD               |
| C15:0     | <LOD                | <LOD               | 0.01 ±<br>0.002 a   | 0.01 ±<br>0.001 a  | 0.01 ±<br>0.001 a  | 0.03 ±<br>0.004 b  | <LOD               | <LOD               | 0.08 ±<br>0.009 c   | <LOD               | 0.13 ±<br>0.021 d  | <LOD               | <LOD               | <LOD               |
| C15:1     | <LOD                | <LOD               | 0.01 ±<br>0.002 a   | 0.02 ±<br>0.004 b  | <LOD               | 0.06 ±<br>0.013 c  | <LOD               | <LOD               | 0.08 ±<br>0.012 c   | <LOD               | 0.11 ±<br>0.025 d  | <LOD               | <LOD               | <LOD               |
| C15:2     | <LOD                | <LOD               | <LOD                | <LOD               | <LOD               | <LOD               | <LOD               | <LOD               | <LOD                | <LOD               | <LOD               | <LOD               | <LOD               | <LOD               | <LOD               | <LOD               | <LOD               | <LOD               | <LOD               | <LOD               |
| C16:0     | 9.81 ±<br>1.136 a   | 9.56 ±<br>1.447 a  | 9.62 ±<br>2.125 a   | 9.59 ±<br>1.65 a   | 9.63 ±<br>0.809 a  | 10.17 ±<br>1.034 a | 9.61 ±<br>0.882 a  | 9.78 ±<br>1.664 a  | 11.69 ±<br>1.091 a  | 10.64 ±<br>2.26 a  | 10.08 ±<br>1.238 a | 11.08 ±<br>1.854 a | 10.97 ±<br>1.731 a | 10.09 ±<br>1.56 a  | 10.92 ±<br>1.363 a | 10.14 ±<br>1.5 a   | 13.42 ±<br>1.408 b | 11.05 ±<br>1.684 a | 13.59 ±<br>1.228 b | 10.95 ±<br>1.86 a  |
| C16:1     | 0.14 ±<br>0.023 b   | 0.1 ±<br>0.009 a   | 0.12 ±<br>0.011 a   | 0.1 ±<br>0.019 a   | 0.09 ±<br>0.02 a   | 0.14 ±<br>0.029 b  | 0.11 ±<br>0.015 a  | 0.16 ±<br>0.033 b  | 0.19 ±<br>0.038 b   | 0.16 ±<br>0.022 b  | 0.13 ±<br>0.028 a  | 0.16 ±<br>0.013 b  | 0.21 ±<br>0.039 c  | 0.15 ±<br>0.017 b  | 0.14 ±<br>0.029 a  | 0.16 ±<br>0.025 b  | 0.22 ±<br>0.027 c  | 0.21 ±<br>0.034 c  | 0.43 ±<br>0.057 d  | 0.14 ±<br>0.031 a  |
| C16:2     | <LOD                | <LOD               | <LOD                | <LOD               | <LOD               | <LOD               | <LOD               | <LOD               | <LOD                | <LOD               | <LOD               | <LOD               | <LOD               | <LOD               | <LOD               | <LOD               | <LOD               | <LOD               | <LOD               | <LOD               |
| C17:0     | 0.06 ±<br>0.01 a    | 0.06 ±<br>0.008 a  | 0.06 ±<br>0.012 a   | 0.06 ±<br>0.009 a  | 0.06 ±<br>0.006 a  | 0.09 ±<br>0.017 b  | 0.06 ±<br>0.013 a  | 0.07 ±<br>0.007 a  | 0.12 ±<br>0.02 b    | 0.07 ±<br>0.008 a  | 0.09 ±<br>0.021 a  | 0.08 ±<br>0.007 a  | 0.11 ±<br>0.022 b  | 0.08 ±<br>0.017 a  | 0.08 ±<br>0.015 a  | 0.08 ±<br>0.013 a  | 0.16 ±<br>0.014 c  | <LOD               | 0.15 ±<br>0.021 c  | <LOD               |
| C17:1     | 0.03 ±<br>0.007 a   | 0.03 ±<br>0.004 a  | 0.03 ±<br>0.002 a   | 0.03 ±<br>0.006 a  | 0.03 ±<br>0.004 a  | 0.03 ±<br>0.003 a  | 0.04 ±<br>0.007 b  | 0.05 ±<br>0.011 b  | <LOD                | <LOD               | <LOD               | <LOD               | <LOD               | 0.05 ±<br>0.006 b  | 0.03 ±<br>0.003 a  | 0.05 ±<br>0.011 b  | <LOD               | <LOD               | <LOD               | <LOD               |
| C17:2     | <LOD                | <LOD               | <LOD                | <LOD               | <LOD               | <LOD               | <LOD               | <LOD               | <LOD                | <LOD               | <LOD               | <LOD               | <LOD               | <LOD               | <LOD               | <LOD               | <LOD               | <LOD               | <LOD               | <LOD               |
| C18:0     | 2.65 ±<br>0.534 a   | 2.36 ±<br>0.443 a  | 2.41 ±<br>0.286 a   | 2.4 ±<br>0.533 a   | 2.32 ±<br>0.528 a  | 2.72 ±<br>0.392 a  | 2.4 ±<br>0.549 a   | 2.52 ±<br>0.223 a  | 2.95 ±<br>0.259 a   | 2.8 ±<br>0.308 a   | 2.63 ±<br>0.435 a  | 2.82 ±<br>0.284 a  | 3.01 ±<br>0.246 a  | 2.72 ±<br>0.386 a  | 2.69 ±<br>0.38 a   | 2.83 ±<br>0.232 a  | 3.48 ±<br>0.649 b  | 3.44 ±<br>0.714 b  | 4.35 ±<br>0.845 b  | 2.78 ±<br>0.263 a  |
| C18:1 tr. | <LOD                | 0.01 ±<br>0.001 a  | 0.01 ±<br>0.002 a   | 0.01 ±<br>0.001 a  | 0.01 ±<br>0.002 a  | <LOD               | <LOD               | <LOD               | <LOD                | <LOD               | <LOD               | <LOD               | <LOD               | <LOD               | <LOD               | <LOD               | 0.08 ±<br>0.014 b  | <LOD               | <LOD               | <LOD               |
| C18:1     | 32.91 ±<br>6.351 a  | 33.05 ±<br>4.593 a | 33.11 ±<br>4.656 a  | 32.95 ±<br>5.529 a | 33.16 ±<br>6.352 a | 32.7 ±<br>7.234 a  | 32.95 ±<br>6.979 a | 33.16 ±<br>6.036 a | 32.5 ±<br>7.253 a   | 33.32 ±<br>7.192 a | 32.92 ±<br>2.794 a | 32.72 ±<br>6.851 a | 33.44 ±<br>5.138 a | 33.06 ±<br>7.531 a | 33.98 ±<br>2.781 a | 32.97 ±<br>6.513 a | 32.16 ±<br>3.396 a | 33.51 ±<br>7.167 a | 33.7 ±<br>3.187 a  | 32.74 ±<br>7.058 a |
| C18:2 tr. | <LOD                | <LOD               | <LOD                | <LOD               | <LOD               | <LOD               | <LOD               | <LOD               | <LOD                | <LOD               | <LOD               | <LOD               | <LOD               | <LOD               | <LOD               | <LOD               | <LOD               | <LOD               | <LOD               | <LOD               |
| C18:2     | 51.84 ±<br>10.745 a | 52.58 ±<br>5.282 a | 52.18 ±<br>10.126 a | 52.44 ±<br>9.034 a | 52.49 ±<br>9.557 a | 50.9 ±<br>11.561 a | 51.85 ±<br>5.119 a | 51.7 ±<br>5.8 a    | 47.91 ±<br>10.051 a | 49.62 ±<br>5.513 a | 50.94 ±<br>8.246 a | 48.77 ±<br>9.481 a | 48.02 ±<br>9.109 a | 50.44 ±<br>6.885 a | 48.89 ±<br>6.828 a | 50.46 ±<br>8.265 a | 44.28 ±<br>7.863 a | 46.61 ±<br>9.771 a | 41.02 ±<br>4.912 a | 49.34 ±<br>9.024 a |
| C20:0     | 0.48 ±<br>0.049 a   | 0.48 ±<br>0.043 a  | 0.48 ±<br>0.085 a   | 0.48 ±<br>0.1 a    | 0.48 ±<br>0.093 a  | 0.47 ±<br>0.095 a  | 0.49 ±<br>0.112 a  | 0.48 ±<br>0.075 a  | 0.45 ±<br>0.076 a   | 0.47 ±<br>0.056 a  | 0.51 ±<br>0.061 a  | 0.48 ±<br>0.048 a  | 0.48 ±<br>0.069 a  | 0.53 ±<br>0.049 a  | 0.47 ±<br>0.087 a  | 0.49 ±<br>0.058 a  | 0.41 ±<br>0.094 a  | 0.41 ±<br>0.052 a  | 0.46 ±<br>0.044 a  | 0.42 ±<br>0.09 a   |
| C18:3     | 1.18 ±<br>0.175 a   | 1.01 ±<br>0.174 a  | 1.04 ±<br>0.122 a   | 1.05 ±<br>0.217 a  | 0.95 ±<br>0.213 a  | 1.46 ±<br>0.21 b   | 1.69 ±<br>0.195 b  | 1.25 ±<br>0.141 a  | 1.81 ±<br>0.251 b   | 1.53 ±<br>0.323 b  | 1.59 ±<br>0.15 b   | 1.98 ±<br>0.347 b  | 1.78 ±<br>0.202 b  | 1.59 ±<br>0.147 b  | 1.57 ±<br>0.195 b  | 1.73 ±<br>0.286 b  | 1.84 ±<br>0.273 b  | 2.89 ±<br>0.313 c  | 2.92 ±<br>0.41 c   | 2.54 ±<br>0.262 c  |
| C20:1     | 0.3 ±<br>0.037 b    | 0.2 ±<br>0.041 a   | 0.27 ±<br>0.028 b   | 0.23 ±<br>0.022 a  | 0.24 ±<br>0.035 a  | 0.26 ±<br>0.057 a  | 0.26 ±<br>0.046 a  | 0.27 ±<br>0.036 a  | 0.3 ±<br>0.069 a    | 0.25 ±<br>0.054 a  | 0.24 ±<br>0.027 a  | 0.25 ±<br>0.057 a  | 0.27 ±<br>0.035 a  | 0.3 ±<br>0.059 b   | 0.29 ±<br>0.056 a  | 0.26 ±<br>0.048 a  | 0.3 ±<br>0.053 b   | 0.34 ±<br>0.071 b  | 0.64 ±<br>0.083 c  | 0.25 ±<br>0.049 a  |
| C18:3     | <LOD                | <LOD               | <LOD                | <LOD               | <LOD               | <LOD               | <LOD               | <LOD               | <LOD                | <LOD               | <LOD               | <LOD               | <LOD               | <LOD               | 0.14 ±<br>0.021    | <LOD               | <LOD               | <LOD               | <LOD               | <LOD               |

|       |                   |                   |                   |                   |                   |                   |                   |                   |                   |                   |                   |                   |                   |                   |                   |                   |                   |                   |                   |                   |
|-------|-------------------|-------------------|-------------------|-------------------|-------------------|-------------------|-------------------|-------------------|-------------------|-------------------|-------------------|-------------------|-------------------|-------------------|-------------------|-------------------|-------------------|-------------------|-------------------|-------------------|
| C18:4 | <LOD              |
| C21:0 | <LOD              | 0.02 ±<br>0.003 b | 0.01 ±<br>0.002 a | 0.01 ±<br>0.001 a | 0.01 ±<br>0.002 a | <LOD              |
| C20:2 | <LOD              | 0.01 ±<br>0.001 a | 0.02 ±<br>0.004 b | 0.01 ±<br>0.002 a | 0.02 ±<br>0.003 b | <LOD              | <LOD              | 0.04 ±<br>0.006 c | <LOD              | <LOD              | <LOD              | <LOD              | <LOD              | <LOD              | 0.02 ±<br>0.005 b | <LOD              | <LOD              | <LOD              | <LOD              | <LOD              |
| C22:0 | 0.15 ±<br>0.022 a | 0.15 ±<br>0.031 a | 0.13 ±<br>0.02 a  | 0.13 ±<br>0.023 a | 0.13 ±<br>0.026 a | 0.16 ±<br>0.018 b | 0.12 ±<br>0.017 a | 0.15 ±<br>0.019 a | 0.14 ±<br>0.018 a | 0.19 ±<br>0.019 b | 0.14 ±<br>0.023 a | 0.15 ±<br>0.025 a | 0.18 ±<br>0.039 b | 0.15 ±<br>0.028 a | 0.17 ±<br>0.021 b | 0.12 ±<br>0.017 a | 0.16 ±<br>0.015 b | 0.2 ±<br>0.039 b  | 0.18 ±<br>0.031 b | 0.2 ±<br>0.045 b  |
| C20:3 | <LOD              | <LOD              | <LOD              | 0.01 ±<br>0.001 a | <LOD              | <LOD              | <LOD              | <LOD              | <LOD              | <LOD              | 0.07 ±<br>0.008 b | <LOD              | <LOD              | 0.1 ±<br>0.012 c  | <LOD              | <LOD              | 0.1 ±<br>0.012 c  | 0.2 ±<br>0.022 d  | 0.24 ±<br>0.03 d  | <LOD              |
| C22:1 | <LOD              | <LOD              | 0.01 ±<br>0.002 a | 0.01 ±<br>0.001 a | 0.01 ±<br>0.002 a | <LOD              |
| C20:3 | 0.12 ±<br>0.021 b | 0.09 ±<br>0.016 a | 0.1 ±<br>0.017 b  | 0.09 ±<br>0.008 b | 0.07 ±<br>0.006 a | 0.16 ±<br>0.036 c | 0.1 ±<br>0.01 b   | 0.09 ±<br>0.016 b | 0.15 ±<br>0.016 c | 0.14 ±<br>0.025 c | 0.14 ±<br>0.013 c | 0.14 ±<br>0.019 c | 0.2 ±<br>0.035 d  | 0.18 ±<br>0.032 c | 0.13 ±<br>0.012 c | 0.12 ±<br>0.019 b | 0.15 ±<br>0.034 c | 0.35 ±<br>0.044 e | 0.31 ±<br>0.048 e | <LOD              |
| C23:0 | <LOD              |
| C20:4 | <LOD              | <LOD              | <LOD              | 0.01 ±<br>0.002 a | 0.01 ±<br>0.001 a | <LOD              |
| C22:2 | <LOD              | <LOD              | <LOD              | <LOD              | 0.01 ±<br>0.002   | <LOD              |
| C24:0 | 0.13 ±<br>0.021 a | 0.16 ±<br>0.031 b | 0.15 ±<br>0.019 b | 0.15 ±<br>0.02 a  | 0.14 ±<br>0.018 a | 0.14 ±<br>0.031 a | 0.14 ±<br>0.015 a | 0.17 ±<br>0.021 b | 0.14 ±<br>0.028 a | 0.14 ±<br>0.03 a  | 0.12 ±<br>0.011 a | 0.2 ±<br>0.017 c  | 0.13 ±<br>0.014 a | 0.19 ±<br>0.019 c | 0.17 ±<br>0.037 b | 0.15 ±<br>0.016 b | 0.14 ±<br>0.028 a | nd                | 0.17 ±<br>0.02 b  | 0.16 ±<br>0.025 b |
| C20:5 | <LOD              | <LOD              | 0.02 ±<br>0.004   | <LOD              | 0.2 ±<br>0.035    | <LOD              |
| C24:1 | <LOD              | <LOD              | <LOD              | <LOD              | 0.01 ±<br>0.001   | <LOD              |
| C22:5 | <LOD              |
| C22:6 | 0.1 ±<br>0.02 b   | 0.05 ±<br>0.009 a | 0.07 ±<br>0.01 b  | 0.06 ±<br>0.014 a | 0.05 ±<br>0.008 a | 0.06 ±<br>0.005 a | 0.06 ±<br>0.008 a | <LOD              | 0.19 ±<br>0.041 c | <LOD              |

C – corn by-product samples; con – control samples (non-extruded, non-fermented); Lpl, Lu, Lc, Lpa – fermented with *L. plantarum*-LUHS122, *L. uvarum*-LUHS245, *L. casei*-LUHS210, and *L. paracasei*-LUHS244 strains, respectively; ex – extruded samples; 14, 16, 18 – moisture content of the corn by-product samples; < LOD – lower than the limit of detection (LOD values are given in Supplementary Data 3). Data are represented as means (n = 3) ± SE. a–e – mean values within a column denoted with different letters are significantly different (p ≤ 0.05).
