# Supplementary material for: Combined Thermomechanical–Biological Treatment for Corn By-Product Valorization into Added-Value Food (Feed) Material
Source: MDPI journal article supplement (doi:10.3390/plants11223080), 2022-11-14
Supplement: s1 [file s1]

# SUPPLEMENTARY DATA

**Table S2.** Limit of detection values (LOD) for analysed fatty acids.

| Fatty acid | LOD, µg/mL | Fatty acid | LOD, µg/mL |
|------------|------------|------------|------------|
| C4:0       | 6.76       | C17:2      | 2.14       |
| C6:0       | 4.13       | C18:0      | 4.24       |
| C8:0       | 3.29       | C18:1 tr.  | 2.16       |
| C10:0      | 2.88       | C18:1      | 3.90       |
| C10:1      | 2.65       | C18:2 tr.  | 1.88       |
| C10:2      | 2.73       | C18:2      | 1.87       |
| C11:0      | 2.46       | C20:0      | 4.01       |
| C11:1      | 2.87       | C18:3      | 2.47       |
| C11:2      | 2.21       | C20:1      | 2.30       |
| C12:0      | 2.87       | C18:3      | 2.17       |
| C12:1      | 2.53       | C18:4      | 2.11       |
| C12:2      | 2.42       | C21:0      | 2.07       |
| C13:0      | 1.46       | C20:2      | 2.10       |
| C13:1      | 1.15       | C22:0      | 4.40       |
| C13:2      | 1.43       | C20:3      | 2.28       |
| C14:0      | 2.96       | C22:1      | 2.40       |
| C14:1      | 1.65       | C20:3      | 1.74       |
| C14:2      | 1.55       | C23:0      | 3.45       |
| C15:0      | 2.11       | C20:4      | 6.52       |
| C15:1      | 1.94       | C22:2      | 2.40       |
| C15:2      | 1.84       | C24:0      | 4.47       |
| C16:0      | 4.93       | C20:5      | 1.68       |
| C16:1      | 2.25       | C24:1      | 2.51       |
| C16:2      | 2.10       | C22:5      | 2.84       |
| C17:0      | 2.13       | C22:6      | 3.84       |
| C17:1      | 2.15       |            |            |
